# Supplementary material for: Low Levels of Amyloid Precursor Protein (APP) Promote Neurogenesis and Decrease Gliogenesis in Human Neural Stem Cells
Source: MDPI journal article supplement (doi:10.3390/ijms241914635), 2023-09-27
Supplement: s1 [file s1]

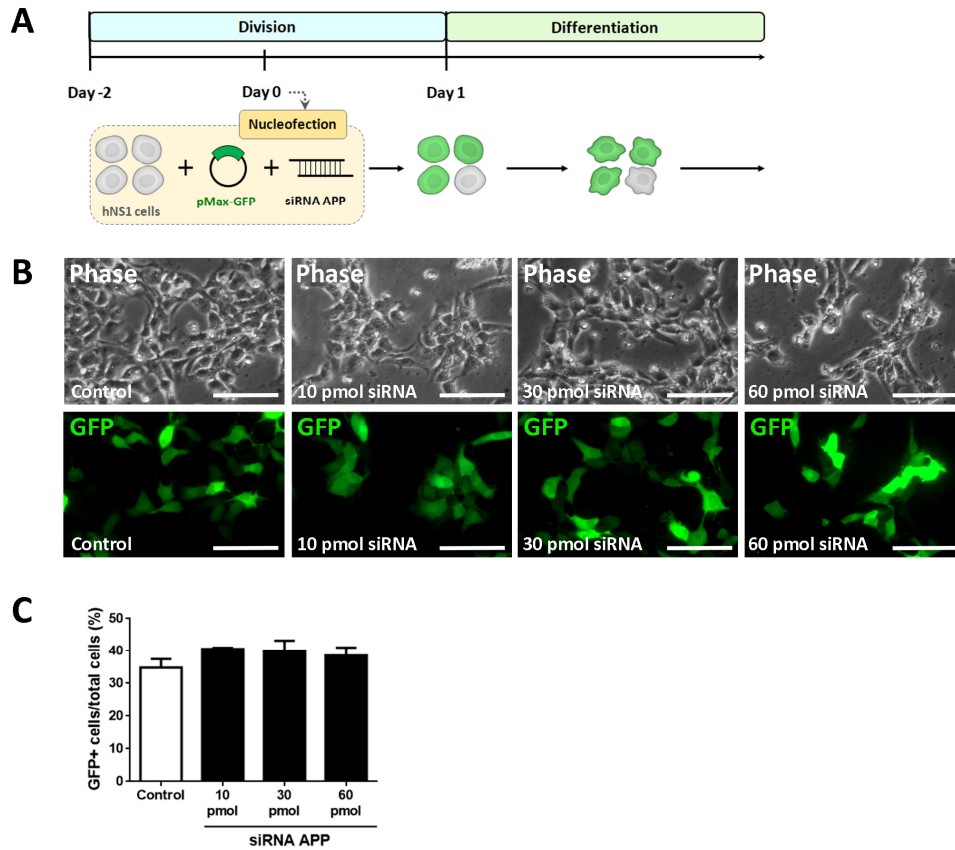

**Supplementary Figure S1:** Nucleofection efficiency in hNS1 cells. (A) Schematic representation of co-nucleofection experiment (siRNA APP and pMax-GFP) done in hNS1 cells. (B) Representative images in phase contrast and the corresponding field with GFP+ cells in control hNS1 cells and hNS1 cells with APP silencing (10 pmol, 30 pmol, 60 pmol siRNA). Scale bar = 50  $\mu$ m. (C) Percentage of GFP+ cells with respect to total cells (phase contrast) in all study groups (control, 10 pmol, 30 pmol, 60 pmol siRNA). Data represent mean  $\pm$  SD (n=3 for three independent samples). Statistical analysis was performed using one-way ANOVA (multiple comparison of each group vs control group).
